# Supplementary material for: Subnanometric CoSn clusters embedded in N-doped carbon nanoboxes (SN-CoSn@C NBs) realize high efficiency adsorption–conversion of polysulfides
Source: Royal Society of Chemistry journal article supplement (doi:10.1039/d2ta06501k), 2022-01-01
Supplement: d2ta06501k1.pdf [file d2ta06501k1.pdf]

## Supporting information

### Subnanometric CoSn clusters Embedded N-doped Carbon Nanobox (SN-CoSn@C NBs) Realizes High Efficiency Adsorption-Conversion of Polysulfide

Ruili Gao,<sup>‡a</sup> Qian Zhang,<sup>‡a</sup> Hui Wang,<sup>\*a</sup> Xuyun Wang,<sup>a</sup> Jianwei Ren<sup>\*b</sup> and Rongfang Wang<sup>\*a</sup>

<sup>a</sup>State Key Laboratory Base for Eco-Chemical Engineering, College of Chemical Engineering, Qingdao University of Science and Technology, Qingdao, 266042, China

email: [wangh@qust.edu.cn](mailto:wangh@qust.edu.cn) (H. Wang) [rffwang@qust.edu.cn](mailto:rffwang@qust.edu.cn) (R. Wang)

<sup>b</sup>Department of Mechanical Engineering Science, University of Johannesburg, Cnr Kingsway and University Roads, Auckland Park, 2092, Johannesburg, South Africa

email: [jren@uj.ac.za](mailto:jren@uj.ac.za) (J. Ren)

<sup>‡</sup>Ruili Gao and Qian Zhang contributed to this work equally.

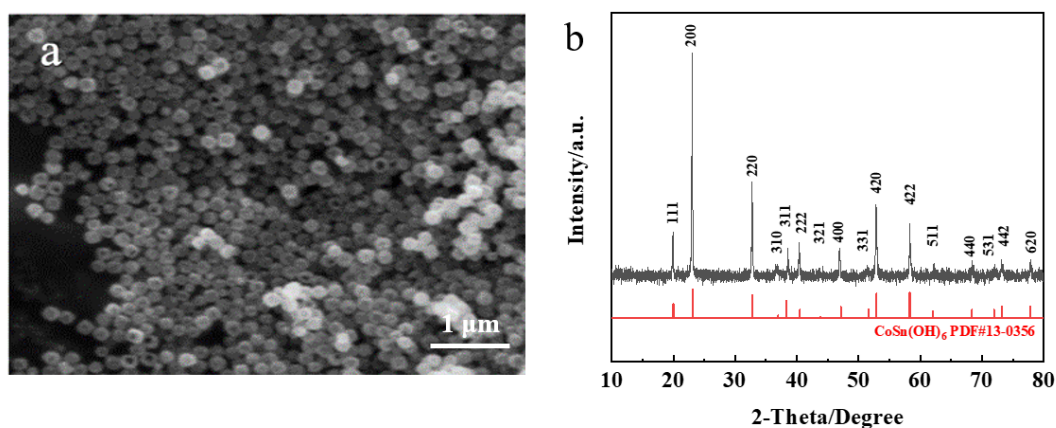

**Fig. S1.** SEM image and XRD pattern of the CoSn(OH)<sub>6</sub> sample.

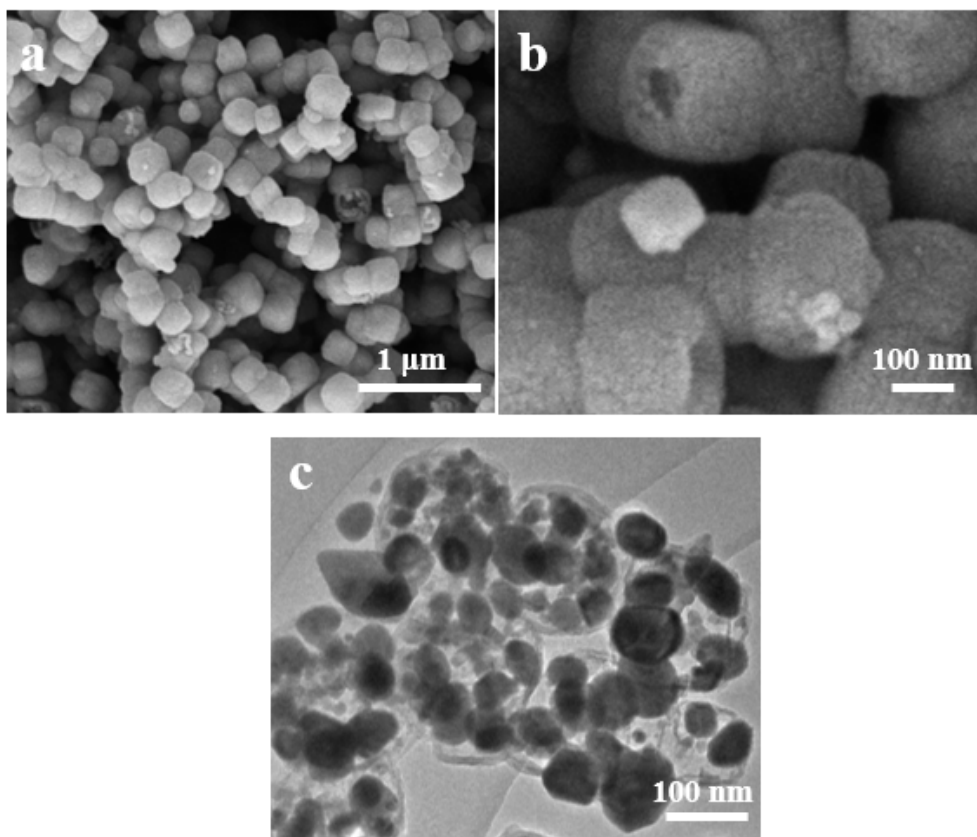

**Fig. S2.** (a, b) SEM and (c) TEM images of the  $\text{CoSnO}_x@\text{C}$  NBs sample.

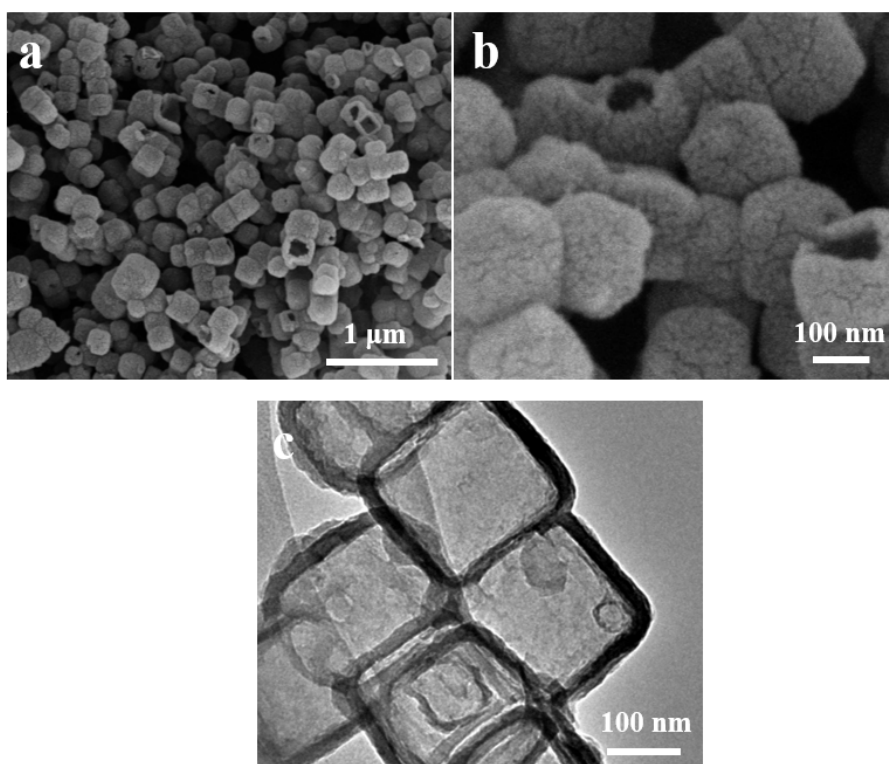

**Fig. S3.** (a, b) SEM and (c) TEM images of the  $\text{CoSn}@\text{C}$  NBs sample.

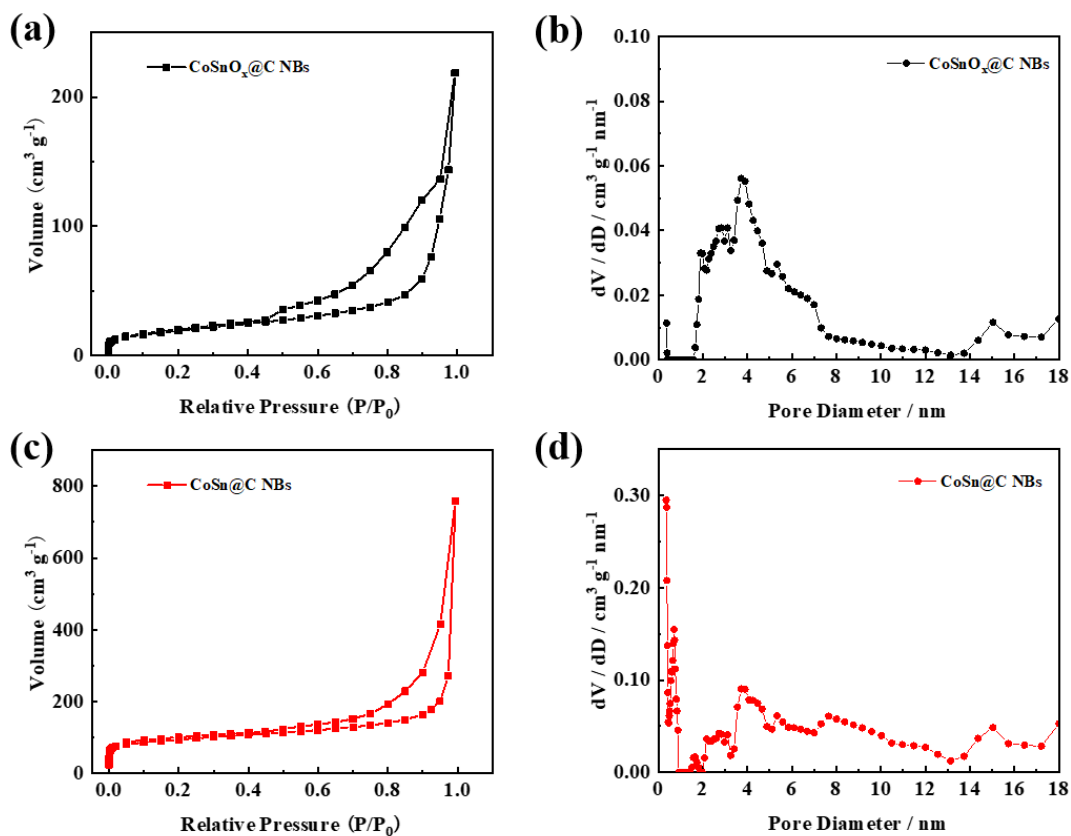

**Fig. S4.** (a) N<sub>2</sub> sorption isotherm and (b) pore-size distribution (PSD) of the CoSnO<sub>x</sub>@C NBs sample. (c) N<sub>2</sub> sorption isotherm and (d) pore-size distribution (PSD) of the CoSn@C NBs sample.

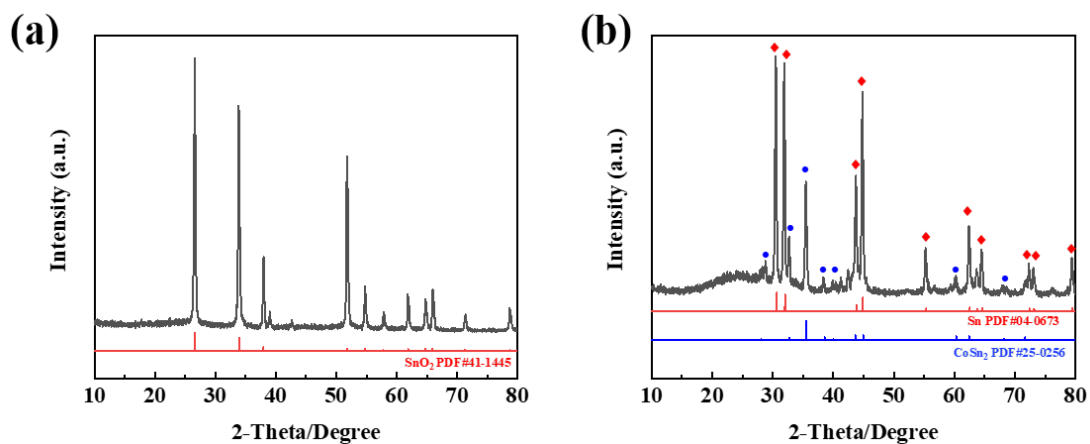

**Fig. S5.** XRD patterns of (a) after 6 M H<sub>2</sub>SO<sub>4</sub> etching, and (b) after H<sub>2</sub> reduction.

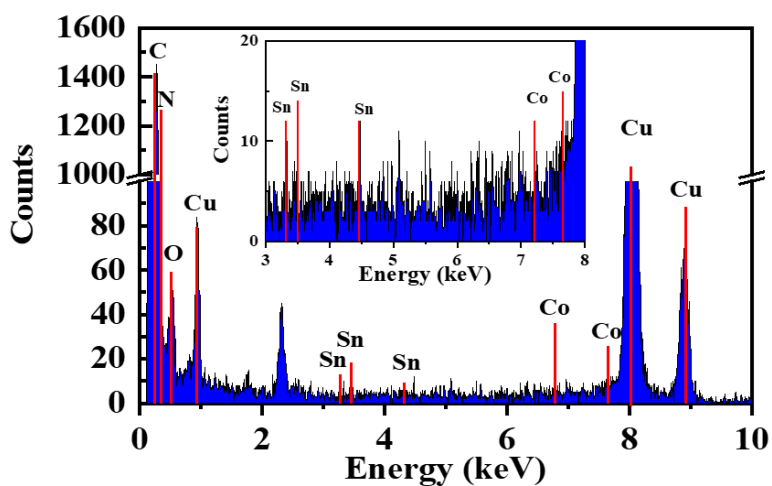

**Fig. S6** EDS spectra of the SN-CoSn@C NBs sample.

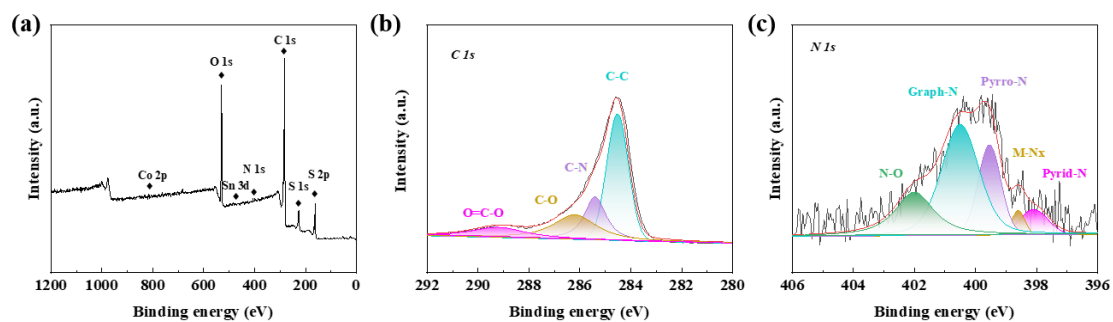

**Fig. S7.** (a) XPS spectrum, (b) high-resolution C *1s* and (c) N *1s* XPS spectrum of the SN-CoSn@C NBs sample.

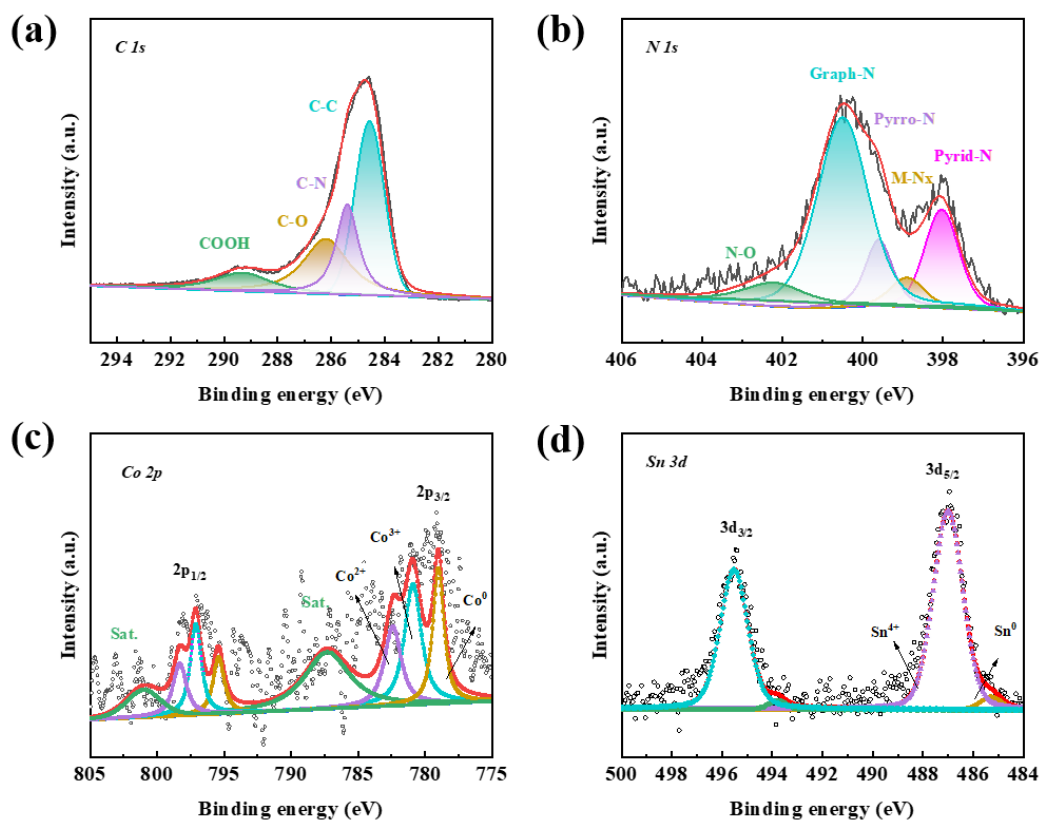

**Fig. S8.** High-resolution XPS spectra of the CoSn@C NBs sample: (a) C 1s, (b) N 1s (c) Co 2p and (d) Sn 3d.

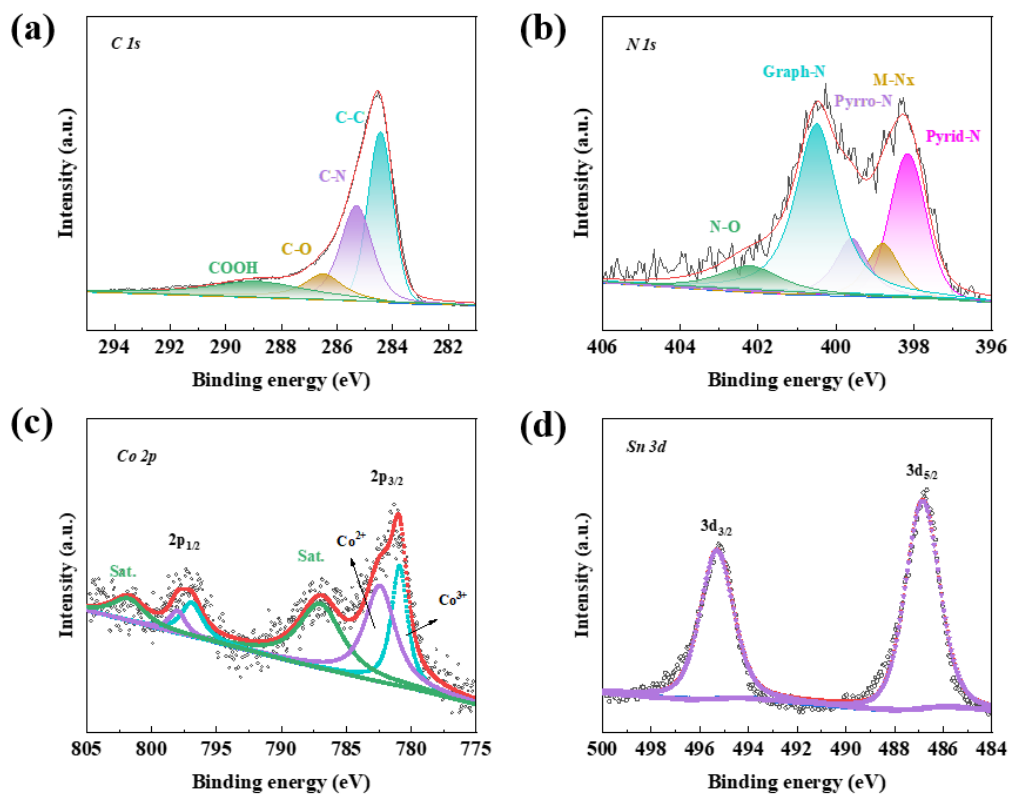

**Fig. S9.** High-resolution XPS spectra of the CoSnO<sub>x</sub>@C NBs sample: (a) C 1s, (b) N

Is (c) Co 2p and (d) Sn 3d.

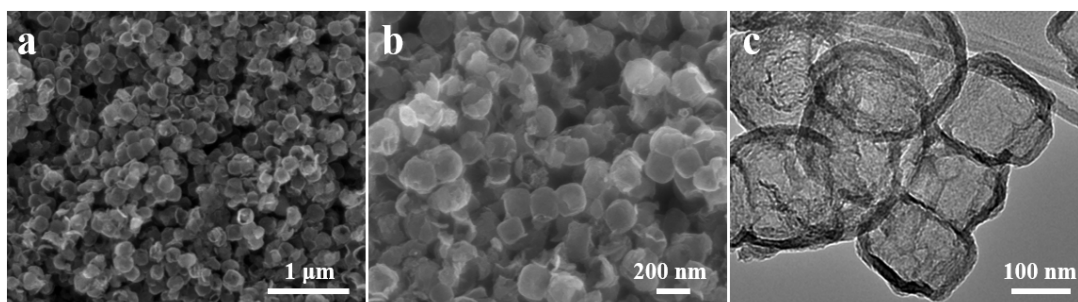

**Fig. S10.** (a, b) SEM and (c) TEM images of the CoSn@C NBs/S sample.

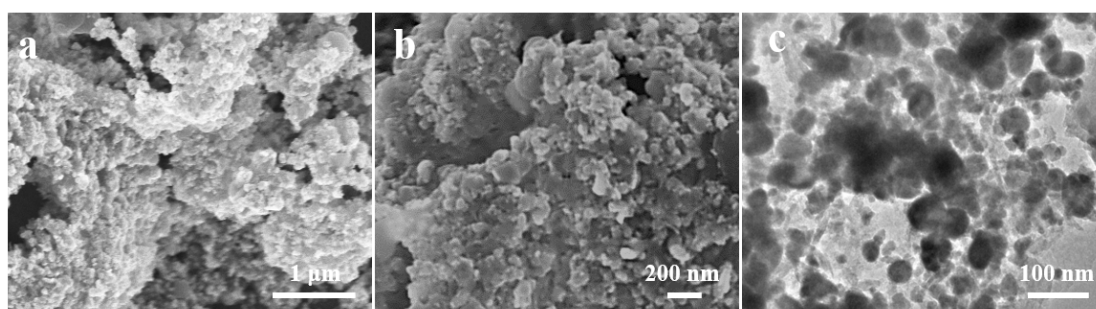

**Fig. S11.** (a, b) SEM and (c) TEM images of the CoSnO<sub>x</sub>@C NBs/S sample.

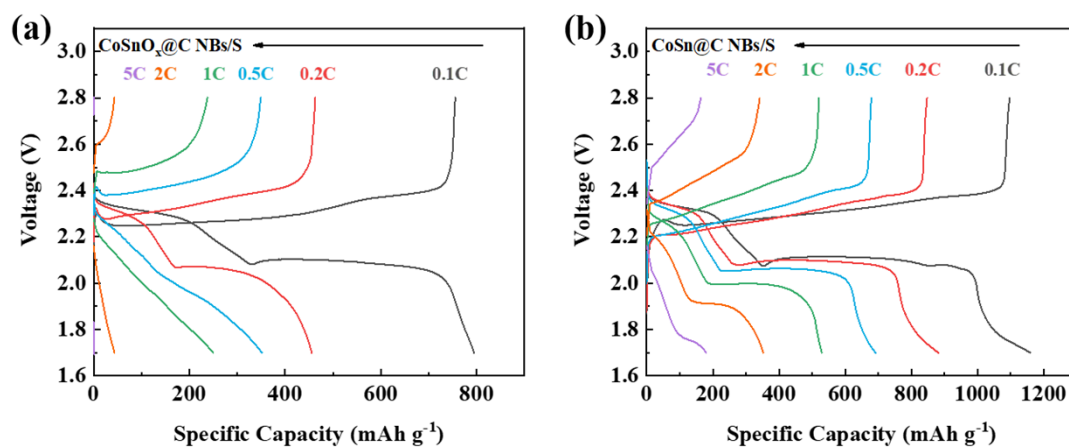

**Fig. S12.** The charge-discharge curves of (a) CoSnO<sub>x</sub>@C NBs/S and (b) CoSn@C NBs/S electrodes at different current densities.

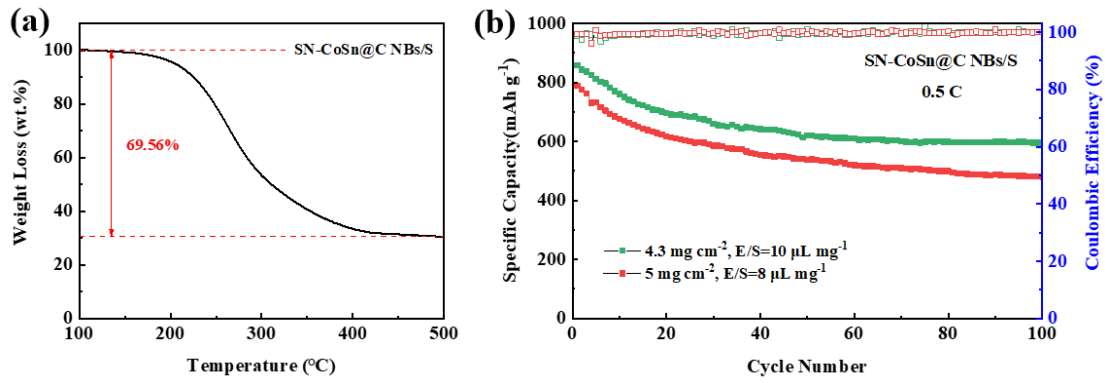

**Fig. S13.** (a) TGA analysis of the SN-CoSn@C NBs sample with 70% S-loading. (b) Cycling stability of SN-CoSn@C NBs/S electrode at 0.5 C: sulfur loading of 4.3 mg cm<sup>-2</sup>, E/S=10 μL mg<sup>-1</sup> and 5 mg cm<sup>-2</sup>, E/S=8 μL mg<sup>-1</sup>.

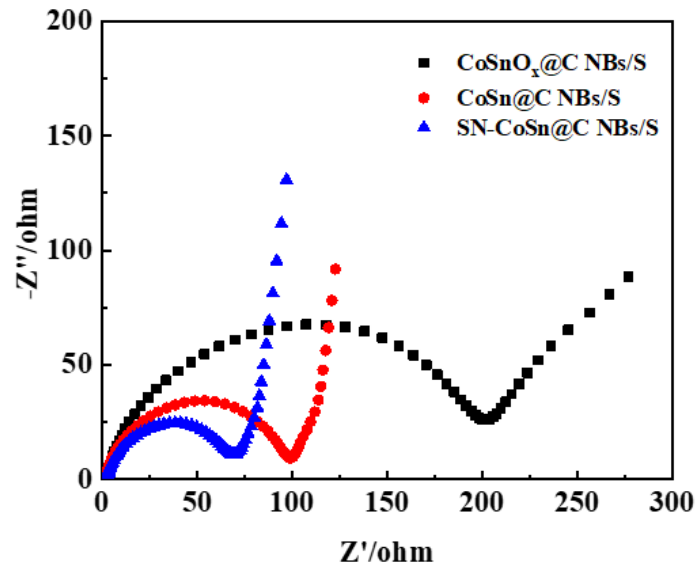

**Fig. S14.** EIS curves of the CoSnO<sub>x</sub>@C NBs/S, CoSn@C NBs/S and SN-CoSn@C NBs/S samples.

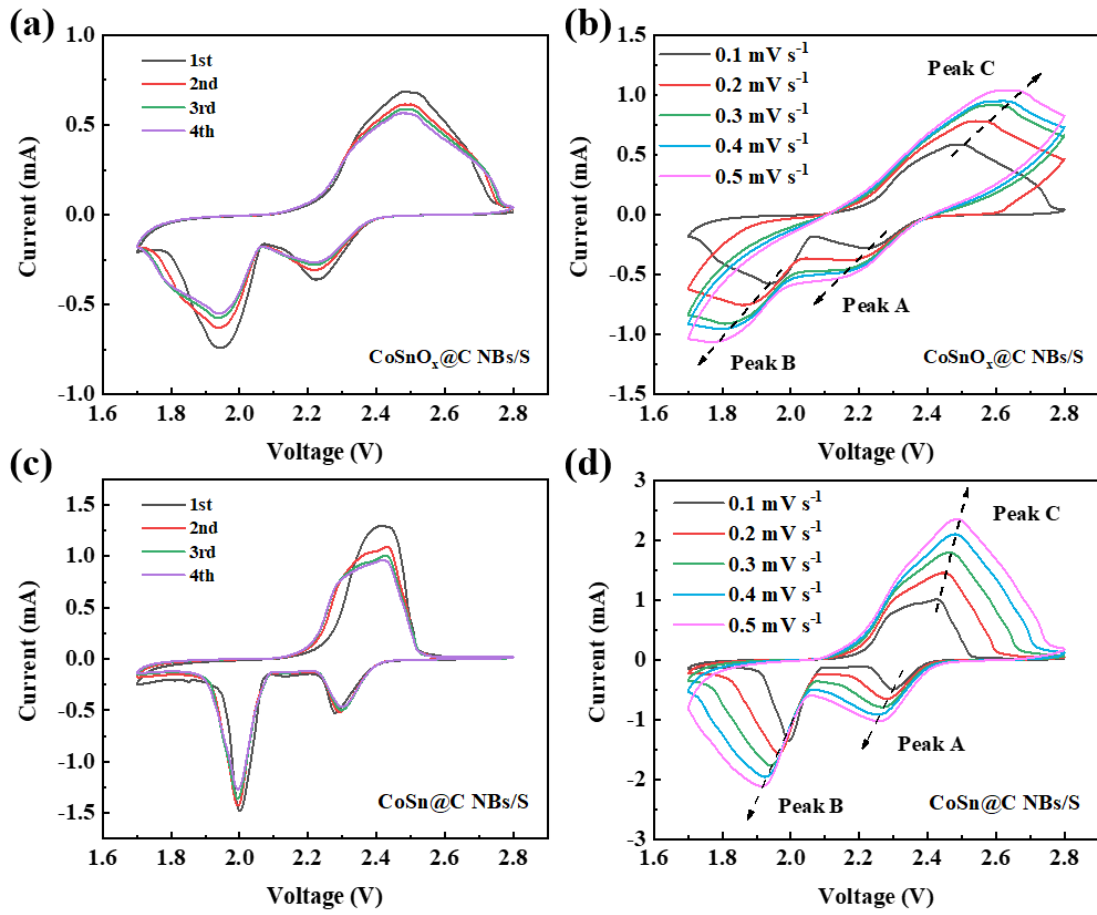

**Fig. S15.** CV curves of the  $\text{CoSnO}_x\text{@C NBs/S}$  sample: (a)  $0.1 \text{ mV s}^{-1}$  and (b)  $0.1\text{-}0.5 \text{ mV s}^{-1}$ . CV curves of the  $\text{CoSn@C NBs/S}$  sample: (c)  $0.1 \text{ mV s}^{-1}$  and (d)  $0.1\text{-}0.5 \text{ mV s}^{-1}$ .

**Table S1.**  $\text{Li}^+$  diffusion coefficients of the  $\text{CoSnO}_x\text{@C NBs/S}$ ,  $\text{CoSn@C NBs/S}$  and  $\text{SN-CoSn@C NBs/S}$  three samples.

| $D_{\text{Li}^+}(\text{cm}^2 \text{ s}^{-1})$ | A(cathodic peak)                                                             | B(cathodic peak)                                                                                         | C(anodic peak)                                                                             |
|-----------------------------------------------|------------------------------------------------------------------------------|----------------------------------------------------------------------------------------------------------|--------------------------------------------------------------------------------------------|
|                                               | $\text{S}_8 \rightarrow \text{LiPS}(\text{Li}_2\text{S}_n, 4 \leq n \leq 8)$ | $\text{LiPS}(\text{Li}_2\text{S}_n, 2 \leq n < 4) \rightarrow \text{Li}_2\text{S}_2/\text{Li}_2\text{S}$ | $\text{Li}_2\text{S}_2/\text{Li}_2\text{S} \rightarrow \text{LiPS} \rightarrow \text{S}_8$ |
| $\text{CoSnO}_x\text{@C NBs/S}$               | $5.03 \times 10^{-10}$                                                       | $1.62 \times 10^{-9}$                                                                                    | $1.43 \times 10^{-9}$                                                                      |
| $\text{CoSn@C NBs/S}$                         | $2.04 \times 10^{-9}$                                                        | $4.31 \times 10^{-9}$                                                                                    | $1.33 \times 10^{-8}$                                                                      |
| $\text{SN-CoSn@C NBs/S}$                      | $7.02 \times 10^{-9}$                                                        | $1.88 \times 10^{-8}$                                                                                    | $4.33 \times 10^{-8}$                                                                      |



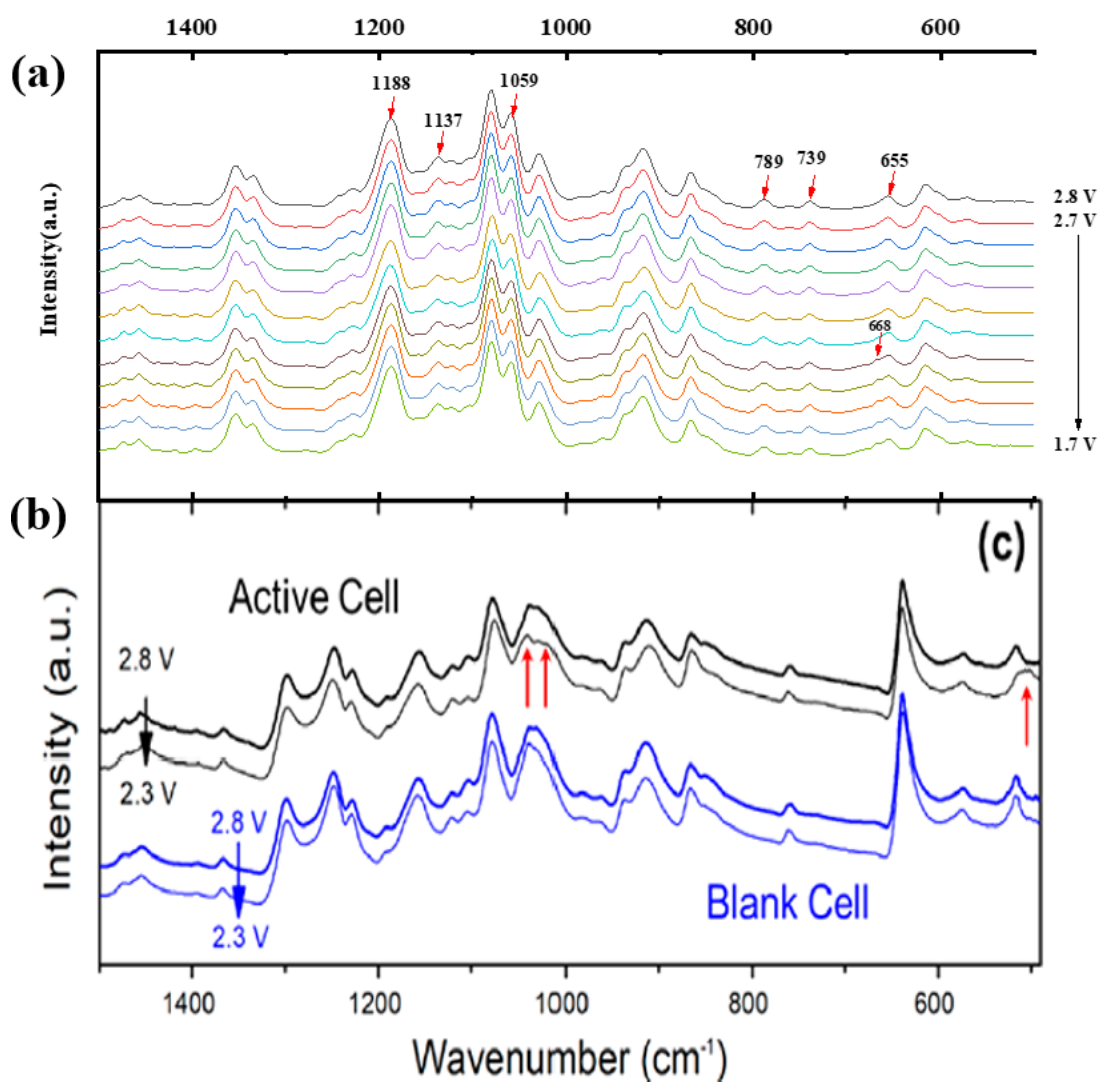

**Fig. S16.** (a) The discharging FTIR spectra of the SN-CoSn@C NBs-assembled LSBs at 500-1500  $\text{cm}^{-1}$ . (b) FTIR spectra from the blank cell in literature <sup>1</sup>. The adsorption peaks are pointed by the red arrows.

**Table S2.** FT-IR peak assignments in literature <sup>1</sup>.

| Peak ( $\text{cm}^{-1}$ ) | Assignment              | Species           | Ref. |
|---------------------------|-------------------------|-------------------|------|
| 1298                      | $\nu_s(\text{SO}_3)$    | ion pairs         | 1    |
| 1248                      | $\nu_{as}(\text{SO}_3)$ | ion pairs         |      |
| 1228                      | $\nu_s(\text{CF}_3)$    | free triflate ion |      |
| 1188                      | $\nu_{as}(\text{SO}_2)$ | triflate ion      | 2    |
| 1167                      | $\nu_{as}(\text{CF}_3)$ | ion pairs         | 1    |
| 1158                      | $\nu_{as}(\text{CF}_3)$ | free triflate ion | 1    |

|      |                             |                                                      |   |
|------|-----------------------------|------------------------------------------------------|---|
| 1137 | $\nu$ (C-N)                 | ion pairs                                            | 3 |
| 1121 | $\nu$ (C-O)                 | DOL, DME, and/or ROLi                                | 1 |
| 1104 | C-O                         | DME                                                  |   |
| 1080 | C-O/CH <sub>2</sub> rocking | DOL                                                  |   |
| 1059 | $\nu_s(\text{SO}_3)$        | ion aggregates                                       |   |
| 1050 |                             | ion aggregates                                       |   |
| 1040 |                             | ion pairs                                            |   |
| 1030 |                             | free ions                                            |   |
| 1015 | C-O                         | DME, DOL                                             |   |
| 936  |                             | DOL ring vibration                                   |   |
| 913  |                             | CH <sub>2</sub> rocking/C-O stretch                  |   |
| 868  | $\delta$ (Li-O)             | R-OLi edge groups                                    |   |
| 789  | $\nu_s(\text{Co-N})$        | ion pairs                                            | 4 |
| 762  | $\delta$ (CF <sub>3</sub> ) | R-OLi edge groups                                    | 1 |
|      |                             | ion pairs                                            |   |
|      |                             | free ions                                            |   |
| 739  | $\nu(\text{Sn-N})$          | ion pairs                                            | 5 |
| 668  | $\nu_{as}(\text{Sn-N})$     | ion pairs                                            |   |
| 655  | $\delta(\text{Sn-N})$       | bending mode                                         |   |
| 616  | $\delta_s(\text{S=O})$      | sulfone, S <sub>2</sub> O <sub>3</sub> <sup>2-</sup> | 1 |
| 572  | $\delta(\text{SO}_3)$       | bending mode                                         |   |
| 517  | $\delta(\text{CF}_3)$       | bending mode                                         |   |
| 504  | (S-S)                       | S <sub>x</sub> <sup>2-</sup> (2 ≤ x ≤ 8)             |   |

**Table S3.** Performance comparison with other electrodes reported in literature.

| Material type                                         | Initial capacity (mAh g <sup>-1</sup> ) | High rate capacity (mAh g <sup>-1</sup> ) | Capacity decay rate per cycle | Ref.      |
|-------------------------------------------------------|-----------------------------------------|-------------------------------------------|-------------------------------|-----------|
| Co-NCNT@CF/S                                          | 1259/0.1 C                              | 627/3 C                                   | 0.038%/3 C/500                | 6         |
| S@CNTs/Co <sub>3</sub> S <sub>4</sub> @NC             | 1570/0.1 C                              | 850/5 C                                   | 0.014%/5 C/1000               | 7         |
| E-Co <sub>x</sub> Sn <sub>y</sub> /NC/S-3             | 1264/0.1 C                              | 778/2 C                                   | 0.0377%/1 C/500               | 8         |
| S-FeCoNi@C-CNB/S                                      | 1238 /0.1 C                             | 676/1 C                                   | 0.049%/1 C/200                | 9         |
| S/FeCo-C                                              | 1251.9/0.2 C                            | 791.9/1 C                                 | 0.073%/1 C/500                | 10        |
| E-CoFeCN@C/S                                          | 1226/0.1 C                              | 899.5/1 C                                 | 0.048%/1 C/300                | 11        |
| S/CoFe <sub>2</sub> O <sub>4</sub> @C                 | 1191/0.2 C                              | 816/2 C                                   | 0.063%/2 C/500                | 12        |
| NiCo <sub>2</sub> S <sub>4</sub> @MoS <sub>2</sub> -S | 1118/0.1 C                              | 1200/5 C                                  | 0.12%/5 C/500                 | 13        |
| SN-CoSn@C NBs                                         | 1291/0.1 C                              | 557.3/5 C                                 | 0.056%/5 C/800                | This work |

## References

- 1 C. Dillard, A. Singh and V. Kalra, *The Journal of Physical Chemistry C*, 2018, **122**, 18195-18203.
- 2 A. Doron, P. Elad, E. Ran, S. Gregory, K. C. Scordilis, A. John, *J. Electrochem. Soc.*, 2009, **156**, 694-702.
- 3 S. Yao, C. Zhang, Y. He, Y. Li, Y. Wang, Y. Liang, X. Shen, T. Li, S. Qin and J. Xiang, *ACS Sustainable Chemistry & Engineering*, 2020, **8**, 7815-7824.
- 4 C. He, Y. Zhang, Y. Zhang, L. Zhao, L. P. Yuan, J. Zhang, J. Ma and J. S. Hu, *Angew Chem Int Ed Engl*, 2020, **59**, 4914-4919.
- 5 A. Andrea, K. Christian, N. Christine, N. Heinrich, S. Martin, S. Wolfgang, *Chem. Ber.* 1996, **129**, 175-89.
- 6 D. Wang, K. Ma, J. Hao, W. Zhang, C. Wang, C. Xu, H. Shi, Z. Ji, X. Yan and Y. Gu, *Nano Energy*, 2021, **89**, 106426-106436.
- 7 H. Zhang, M. Zou, W. Zhao, Y. Wang, Y. Chen, Y. Wu, L. Dai and A. Cao, *ACS Nano*, 2019, **13**, 3982-3991.
- 8 Z. Qiao, F. Zhou, Q. Zhang, F. Pei, H. Zheng, W. Xu, P. Liu, Y. Ma, Q. Xie, L. Wang, X. Fang and D.-L. Peng, *Energy Storage Mater.*, 2019, **23**, 62-71.

- 9 Y.-J. Wu, C.-H. Chen, S.-H. Lin, C.-L. Huang, Y.-X. Yeh, J.-Y. Tan, J.-T. Su, C.-T. Hsieh and S.-Y. Lu, *J. Mater. Chem. A*, 2021, **9**, 9028-9037.
- 10 H. Li, L. Fei, R. Zhang, S. Yu, Y. Zhang, L. Shu, Y. Li and Y. Wang, *J. Energy Chem.*, 2020, **49**, 339-347.
- 11 X. Cao, M. Zhang, F. Zhu and X. Zhang, *J. Alloys Compd.*, 2022, **895**, 162609-162619.
- 12 L.-L. Gu, J. Gao, C. Wang, S.-Y. Qiu, K.-X. Wang, X.-T. Gao, K.-N. Sun, P.-J. Zuo and X.-D. Zhu, *J. Mater. Chem. A*, 2020, **8**, 20604-20611.
- 13 L. Yan, Z. Zhang, F. Yu, J. Wang, T. Mei and X. Wang, *Electrochim. Acta*, 2021, **383**, 138268-138274.
